# Supplementary material for: An ensemble of bias-adjusted CMIP6 climate simulations based on a high-resolution North American reanalysis
Source: PubMed Central journal article supplement (PMC10784550; doi:10.1038/s41597-023-02855-z), 2024-01-11
Supplement: 41597_2023_2855_MOESM1_ESM.pdf [file 41597_2023_2855_MOESM1_ESM.pdf]

Supplemental Information for *An ensemble of bias-adjusted CMIP6 climate simulations based on a high-resolution North American reanalysis*

Juliette Lavoie, Pascal Bourgault, Trevor James Smith, Travis Logan, Martin Leduc, Louis-Philippe Caron, Sarah Gammon, Marco Braun

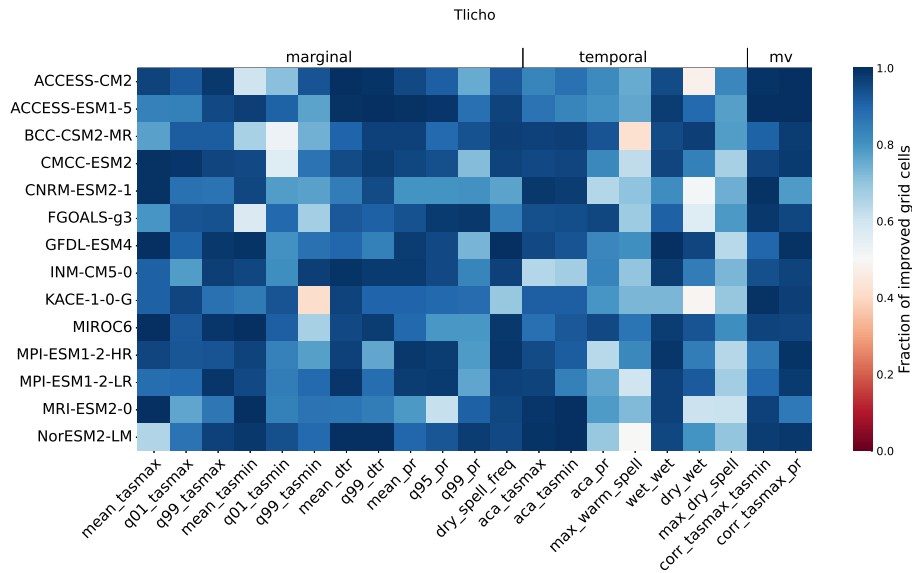

Figure S1: Heatmap of the percentage of improved grid cells (*IMP*) between the original and the bias-adjusted simulations over the Tlicho region for SSP3-7.0. The columns represent the properties (identified by their short name) while the rows represent the climate models. A value close to 1 means that the bias-adjustment improves the given property over most of the area compared to the original simulation, while a value close to 0 means that the original simulation provides a better performance.

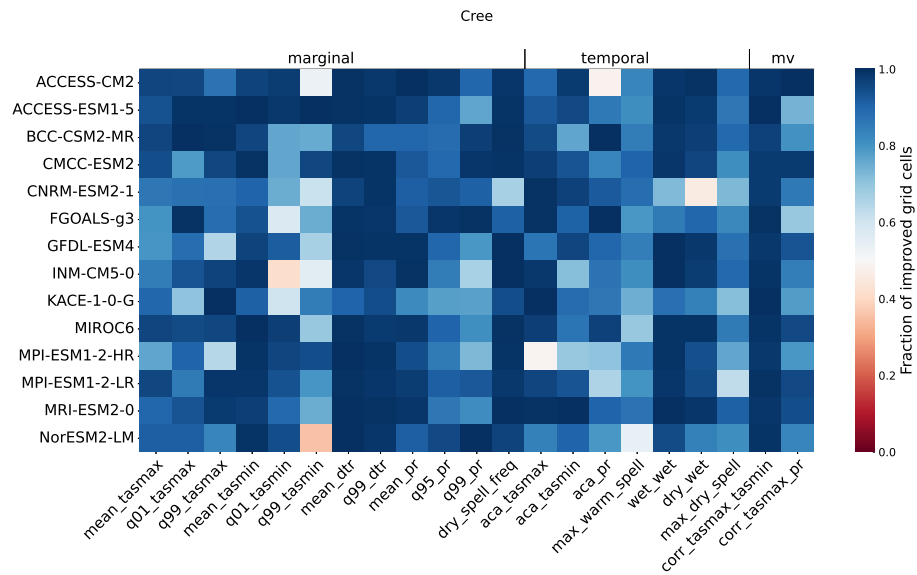

Figure S2: Heatmap of the percentage of improved grid cells (*IMP*) between the original and the bias-adjusted simulations over the Cree region for SSP3-7.0. The columns represent the properties (identified by their short name) while the rows represent the climate models. A value close to 1 means that the bias-adjustment improves the given property over most of the area compared to the original simulation, while a value close to 0 means that the original simulation provides a better performance.

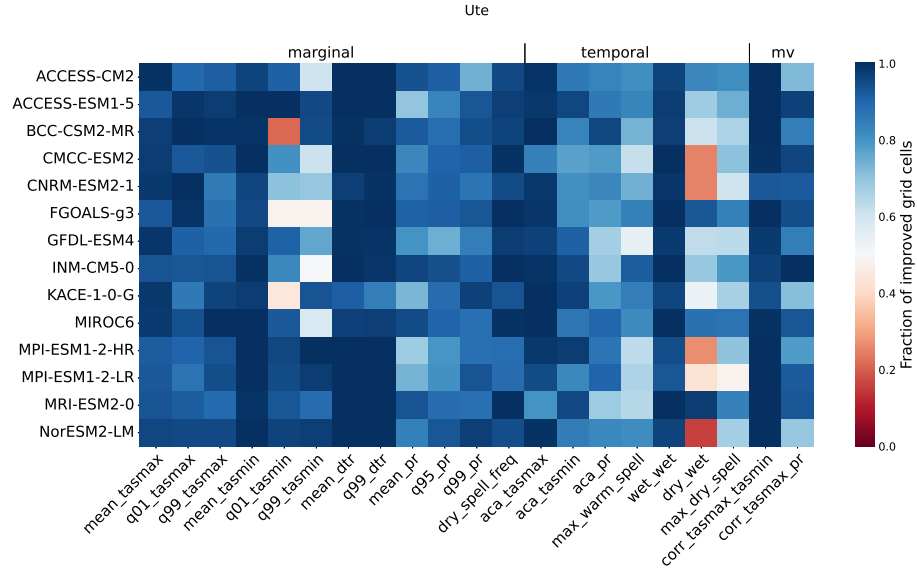

Figure S3: Heatmap of the percentage of improved grid cells (*IMP*) between the original and the bias-adjusted simulations over the Ute region for SSP3-7.0. The columns represent the properties (identified by their short name) while the rows represent the climate models. A value close to 1 means that the bias-adjustment improves the given property over most of the area compared to the original simulation, while a value close to 0 means that the original simulation provides a better performance.

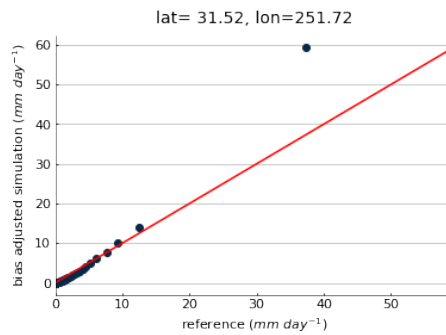

Figure S4: Q-Q plot of the precipitation at one random grid cells for the SSP3-7.0 MIROC6 bias-adjusted simulation and reference regridded on the original GCM grid over the 1981-2010 period. 100 points are plotted, one for each percentile.

Table S1: Each model and ensemble mean RMSE for the the mean daily maximum temperature and each region for SSP3-7.0 between reference and original simulation (OR) and between reference and bias-adjustment simulation (BA).The smaller RMSE is in bold.

| mean_tasmax (°C) |           |             |        |             |      |             |      |             |
|------------------|-----------|-------------|--------|-------------|------|-------------|------|-------------|
|                  | Magtogoek |             | Tlichó |             | Ute  |             | Cree |             |
|                  | OR        | BA          | OR     | BA          | OR   | BA          | OR   | BA          |
| ACCESS-CM2       | 2.37      | <b>0.25</b> | 2.50   | <b>0.45</b> | 3.26 | <b>0.18</b> | 2.50 | <b>0.36</b> |
| ACCESS-ESM1-5    | 2.01      | <b>0.32</b> | 1.42   | <b>0.23</b> | 2.61 | <b>0.27</b> | 2.86 | <b>0.41</b> |
| BCC-CSM2-MR      | 1.42      | <b>0.16</b> | 0.87   | <b>0.21</b> | 2.07 | <b>0.08</b> | 1.63 | <b>0.11</b> |
| CMCC-ESM2        | 2.27      | <b>0.24</b> | 1.97   | <b>0.18</b> | 2.01 | <b>0.08</b> | 1.98 | <b>0.20</b> |
| CNRM-ESM2-1      | 1.76      | <b>0.20</b> | 1.70   | <b>0.11</b> | 3.48 | <b>0.32</b> | 1.57 | <b>0.24</b> |
| FGOALS-g3        | 1.40      | <b>0.43</b> | 1.61   | <b>0.35</b> | 3.19 | <b>0.19</b> | 1.42 | <b>0.31</b> |
| GFDL-ESM4        | 2.24      | <b>0.26</b> | 1.76   | <b>0.11</b> | 2.51 | <b>0.20</b> | 1.61 | <b>0.36</b> |
| INM-CM5-0        | 1.39      | <b>0.32</b> | 1.23   | <b>0.18</b> | 2.12 | <b>0.27</b> | 1.58 | <b>0.34</b> |
| KACE-1-0-G       | 1.59      | <b>0.20</b> | 1.58   | <b>0.51</b> | 2.59 | <b>0.11</b> | 1.92 | <b>0.42</b> |
| MIROC6           | 2.94      | <b>0.33</b> | 3.65   | <b>0.14</b> | 3.58 | <b>0.23</b> | 3.05 | <b>0.40</b> |
| MPI-ESM1-2-HR    | 1.62      | <b>0.10</b> | 1.60   | <b>0.20</b> | 1.53 | <b>0.10</b> | 1.32 | <b>0.33</b> |
| MPI-ESM1-2-LR    | 1.79      | <b>0.13</b> | 1.24   | <b>0.20</b> | 2.25 | <b>0.25</b> | 1.83 | <b>0.11</b> |
| MRI-ESM2-0       | 1.28      | <b>0.27</b> | 3.77   | <b>0.08</b> | 2.75 | <b>0.33</b> | 1.58 | <b>0.27</b> |
| NorESM2-LM       | 1.69      | <b>0.23</b> | 1.24   | <b>0.47</b> | 2.74 | <b>0.21</b> | 1.55 | <b>0.25</b> |
| average          | 1.84      | <b>0.25</b> | 1.87   | <b>0.24</b> | 2.62 | <b>0.20</b> | 1.89 | <b>0.29</b> |

Table S2: Same as Table S1 for the first percentile of daily maximum temperature.

| q01_tasmax (°C) |           |             |        |             |      |             |      |             |
|-----------------|-----------|-------------|--------|-------------|------|-------------|------|-------------|
|                 | Magtogoek |             | Tlicho |             | Ute  |             | Cree |             |
|                 | OR        | BA          | OR     | BA          | OR   | BA          | OR   | BA          |
| ACCESS-CM2      | 5.63      | <b>0.44</b> | 3.85   | <b>0.44</b> | 1.83 | <b>0.43</b> | 2.11 | <b>0.26</b> |
| ACCESS-ESM1-5   | 4.16      | <b>0.70</b> | 3.54   | <b>0.88</b> | 4.08 | <b>0.35</b> | 4.45 | <b>0.57</b> |
| BCC-CSM2-MR     | 7.34      | <b>0.78</b> | 2.79   | <b>0.36</b> | 3.98 | <b>0.26</b> | 3.95 | <b>0.25</b> |
| CMCC-ESM2       | 3.20      | <b>1.20</b> | 3.51   | <b>0.30</b> | 2.58 | <b>0.43</b> | 1.03 | <b>0.41</b> |
| CNRM-ESM2-1     | 3.16      | <b>0.59</b> | 3.42   | <b>0.59</b> | 5.84 | <b>0.55</b> | 3.37 | <b>0.61</b> |
| FGOALS-g3       | 5.35      | <b>1.02</b> | 4.71   | <b>0.96</b> | 3.51 | <b>0.30</b> | 2.97 | <b>0.31</b> |
| GFDL-ESM4       | 1.74      | <b>0.67</b> | 2.57   | <b>0.58</b> | 2.30 | <b>0.38</b> | 1.67 | <b>0.50</b> |
| INM-CM5-0       | 3.23      | <b>0.75</b> | 2.79   | <b>1.07</b> | 3.60 | <b>0.40</b> | 2.54 | <b>0.35</b> |
| KACE-1-0-G      | 4.20      | <b>0.31</b> | 4.68   | <b>0.50</b> | 2.90 | <b>0.74</b> | 2.05 | <b>0.56</b> |
| MIROC6          | 3.42      | <b>0.88</b> | 2.68   | <b>0.48</b> | 2.09 | <b>0.27</b> | 2.42 | <b>0.37</b> |
| MPI-ESM1-2-HR   | 3.99      | <b>0.37</b> | 2.39   | <b>0.44</b> | 1.61 | <b>0.34</b> | 2.08 | <b>0.51</b> |
| MPI-ESM1-2-LR   | 4.40      | <b>0.29</b> | 1.69   | <b>0.35</b> | 1.88 | <b>0.50</b> | 2.20 | <b>0.54</b> |
| MRI-ESM2-0      | 4.60      | <b>0.69</b> | 2.55   | <b>0.72</b> | 2.68 | <b>0.33</b> | 3.74 | <b>0.46</b> |
| NorESM2-LM      | 2.40      | <b>0.62</b> | 2.21   | <b>0.52</b> | 2.74 | <b>0.27</b> | 2.72 | <b>0.64</b> |
| average         | 4.06      | <b>0.67</b> | 3.10   | <b>0.59</b> | 2.97 | <b>0.40</b> | 2.67 | <b>0.45</b> |

Table S3: Same as Table S1 for the 99th percentile of daily maximum temperature .

| q99_tasmax (°C) |           |             |        |             |      |             |      |             |
|-----------------|-----------|-------------|--------|-------------|------|-------------|------|-------------|
|                 | Magtogoek |             | Tlicho |             | Ute  |             | Cree |             |
|                 | OR        | BA          | OR     | BA          | OR   | BA          | OR   | BA          |
| ACCESS-CM2      | 4.42      | <b>0.55</b> | 4.65   | <b>0.41</b> | 3.04 | <b>0.52</b> | 3.69 | <b>1.09</b> |
| ACCESS-ESM1-5   | 6.43      | <b>0.47</b> | 3.41   | <b>0.25</b> | 4.84 | <b>0.44</b> | 6.79 | <b>0.35</b> |
| BCC-CSM2-MR     | 8.91      | <b>0.30</b> | 2.92   | <b>0.33</b> | 6.25 | <b>0.16</b> | 5.55 | <b>0.25</b> |
| CMCC-ESM2       | 4.46      | <b>0.20</b> | 2.72   | <b>0.21</b> | 3.38 | <b>0.33</b> | 3.76 | <b>0.37</b> |
| CNRM-ESM2-1     | 3.40      | <b>0.33</b> | 3.14   | <b>0.37</b> | 2.97 | <b>0.69</b> | 3.08 | <b>0.59</b> |
| FGOALS-g3       | 5.38      | <b>0.61</b> | 3.73   | <b>0.28</b> | 3.24 | <b>0.60</b> | 4.24 | <b>0.82</b> |
| GFDL-ESM4       | 3.44      | <b>0.62</b> | 4.35   | <b>0.37</b> | 2.21 | <b>0.44</b> | 2.56 | <b>0.63</b> |
| INM-CM5-0       | 4.26      | <b>0.46</b> | 4.80   | <b>0.30</b> | 4.74 | <b>0.65</b> | 3.45 | <b>0.55</b> |
| KACE-1-0-G      | 8.28      | <b>0.75</b> | 3.37   | <b>0.58</b> | 6.34 | <b>0.52</b> | 8.68 | <b>0.90</b> |
| MIROC6          | 4.70      | <b>0.44</b> | 6.04   | <b>0.27</b> | 9.94 | <b>0.66</b> | 4.45 | <b>0.97</b> |
| MPI-ESM1-2-HR   | 3.58      | <b>0.36</b> | 2.81   | <b>0.40</b> | 3.27 | <b>0.36</b> | 2.29 | <b>0.75</b> |
| MPI-ESM1-2-LR   | 3.78      | <b>0.29</b> | 4.58   | <b>0.38</b> | 3.34 | <b>0.33</b> | 3.34 | <b>0.30</b> |
| MRI-ESM2-0      | 3.31      | <b>0.38</b> | 3.18   | <b>0.39</b> | 2.69 | <b>0.52</b> | 3.59 | <b>0.59</b> |
| NorESM2-LM      | 4.89      | <b>0.33</b> | 4.61   | <b>0.38</b> | 4.74 | <b>0.55</b> | 3.76 | <b>0.71</b> |
| average         | 4.95      | <b>0.43</b> | 3.88   | <b>0.35</b> | 4.36 | <b>0.48</b> | 4.23 | <b>0.63</b> |

Table S4: Same as Table S1 for the mean of the daily minimum temperature.

| mean_tasmin (°C) |           |             |        |             |      |             |      |             |
|------------------|-----------|-------------|--------|-------------|------|-------------|------|-------------|
|                  | Magtogoek |             | Tlichó |             | Ute  |             | Cree |             |
|                  | OR        | BA          | OR     | BA          | OR   | BA          | OR   | BA          |
| ACCESS-CM2       | 1.84      | <b>0.20</b> | 1.72   | <b>0.48</b> | 2.52 | <b>0.20</b> | 2.07 | <b>0.19</b> |
| ACCESS-ESM1-5    | 3.77      | <b>0.29</b> | 3.60   | <b>0.33</b> | 5.68 | <b>0.21</b> | 5.03 | <b>0.37</b> |
| BCC-CSM2-MR      | 2.29      | <b>0.20</b> | 1.53   | <b>0.30</b> | 2.42 | <b>0.10</b> | 1.31 | <b>0.11</b> |
| CMCC-ESM2        | 2.23      | <b>0.27</b> | 2.31   | <b>0.22</b> | 4.23 | <b>0.11</b> | 4.02 | <b>0.23</b> |
| CNRM-ESM2-1      | 2.72      | <b>0.25</b> | 2.37   | <b>0.25</b> | 1.69 | <b>0.27</b> | 1.22 | <b>0.22</b> |
| FGOALS-g3        | 1.77      | <b>0.45</b> | 1.84   | <b>0.46</b> | 1.87 | <b>0.24</b> | 1.55 | <b>0.28</b> |
| GFDL-ESM4        | 1.30      | <b>0.25</b> | 2.53   | <b>0.20</b> | 1.91 | <b>0.14</b> | 1.96 | <b>0.28</b> |
| INM-CM5-0        | 2.09      | <b>0.40</b> | 2.73   | <b>0.16</b> | 4.33 | <b>0.17</b> | 3.02 | <b>0.34</b> |
| KACE-1-0-G       | 1.61      | <b>0.21</b> | 1.99   | <b>0.58</b> | 2.31 | <b>0.15</b> | 1.58 | <b>0.29</b> |
| MIROC6           | 3.95      | <b>0.34</b> | 4.70   | <b>0.18</b> | 5.42 | <b>0.15</b> | 4.74 | <b>0.28</b> |
| MPI-ESM1-2-HR    | 1.73      | <b>0.11</b> | 2.66   | <b>0.30</b> | 3.67 | <b>0.09</b> | 2.73 | <b>0.30</b> |
| MPI-ESM1-2-LR    | 1.76      | <b>0.11</b> | 2.24   | <b>0.30</b> | 3.77 | <b>0.10</b> | 2.44 | <b>0.14</b> |
| MRI-ESM2-0       | 1.71      | <b>0.23</b> | 3.78   | <b>0.20</b> | 3.33 | <b>0.23</b> | 4.02 | <b>0.20</b> |
| NorESM2-LM       | 2.58      | <b>0.22</b> | 3.68   | <b>0.45</b> | 6.43 | <b>0.20</b> | 3.45 | <b>0.25</b> |
| average          | 2.24      | <b>0.25</b> | 2.69   | <b>0.31</b> | 3.54 | <b>0.17</b> | 2.80 | <b>0.25</b> |

Table S5: Same as Table S1 for the first percentile of daily minimum temperature.

| q01_tasmin (°C) |           |             |        |             |             |             |             |             |
|-----------------|-----------|-------------|--------|-------------|-------------|-------------|-------------|-------------|
|                 | Magtogoek |             | Tlichó |             | Ute         |             | Cree        |             |
|                 | OR        | BA          | OR     | BA          | OR          | BA          | OR          | BA          |
| ACCESS-CM2      | 5.73      | <b>0.95</b> | 3.35   | <b>1.33</b> | 7.54        | <b>2.48</b> | 7.58        | <b>1.41</b> |
| ACCESS-ESM1-5   | 7.36      | <b>1.65</b> | 6.51   | <b>1.74</b> | 10.89       | <b>2.01</b> | 9.68        | <b>1.63</b> |
| BCC-CSM2-MR     | 9.01      | <b>1.57</b> | 2.97   | <b>1.80</b> | <b>3.43</b> | 4.11        | 4.08        | <b>1.71</b> |
| CMCC-ESM2       | 5.31      | <b>3.51</b> | 3.51   | <b>1.40</b> | 6.61        | <b>2.96</b> | 3.80        | <b>2.66</b> |
| CNRM-ESM2-1     | 5.23      | <b>1.17</b> | 3.36   | <b>1.35</b> | 3.44        | <b>2.28</b> | 2.56        | <b>1.44</b> |
| FGOALS-g3       | 8.22      | <b>2.39</b> | 4.34   | <b>1.32</b> | <b>3.02</b> | 3.04        | 3.11        | <b>2.27</b> |
| GFDL-ESM4       | 3.37      | <b>0.96</b> | 2.88   | <b>0.90</b> | 5.74        | <b>1.43</b> | 5.94        | <b>1.26</b> |
| INM-CM5-0       | 6.65      | <b>3.24</b> | 4.08   | <b>1.32</b> | 6.86        | <b>3.65</b> | <b>3.93</b> | 4.14        |
| KACE-1-0-G      | 8.11      | <b>2.62</b> | 6.03   | <b>1.11</b> | 3.32        | <b>2.96</b> | 3.26        | <b>1.96</b> |
| MIROC6          | 6.73      | <b>2.25</b> | 5.44   | <b>1.81</b> | 7.27        | <b>2.00</b> | 7.48        | <b>1.32</b> |
| MPI-ESM1-2-HR   | 4.78      | <b>1.16</b> | 3.02   | <b>0.91</b> | 6.06        | <b>1.61</b> | 6.84        | <b>2.43</b> |
| MPI-ESM1-2-LR   | 4.86      | <b>1.22</b> | 2.66   | <b>0.99</b> | 5.83        | <b>1.45</b> | 6.24        | <b>2.01</b> |
| MRI-ESM2-0      | 5.06      | <b>1.42</b> | 3.48   | <b>1.43</b> | 8.00        | <b>2.59</b> | 7.86        | <b>2.76</b> |
| NorESM2-LM      | 4.30      | <b>1.67</b> | 4.99   | <b>1.31</b> | 9.47        | <b>2.24</b> | 7.51        | <b>1.28</b> |
| average         | 6.05      | <b>1.84</b> | 4.04   | <b>1.34</b> | 6.25        | <b>2.49</b> | 5.71        | <b>2.02</b> |

Table S6: Same as Table S1 for the 99th percentile of daily minimum temperature.

| q99_tasmin (°C) |           |             |        |             |      |             |      |             |
|-----------------|-----------|-------------|--------|-------------|------|-------------|------|-------------|
|                 | Magtogoek |             | Tlichó |             | Ute  |             | Cree |             |
|                 | OR        | BA          | OR     | BA          | OR   | BA          | OR   | BA          |
| ACCESS-CM2      | 2.11      | <b>0.67</b> | 3.29   | <b>0.94</b> | 2.07 | <b>1.36</b> | 1.53 | <b>1.05</b> |
| ACCESS-ESM1-5   | 3.74      | <b>1.01</b> | 2.00   | <b>0.45</b> | 4.58 | <b>1.04</b> | 4.63 | <b>1.15</b> |
| BCC-CSM2-MR     | 1.76      | <b>1.53</b> | 2.82   | <b>1.76</b> | 3.23 | <b>0.57</b> | 1.99 | <b>1.07</b> |
| CMCC-ESM2       | 2.46      | <b>0.73</b> | 2.03   | <b>0.44</b> | 2.93 | <b>1.62</b> | 3.63 | <b>0.95</b> |
| CNRM-ESM2-1     | 1.70      | <b>1.07</b> | 1.75   | <b>0.53</b> | 2.73 | <b>1.35</b> | 1.49 | <b>0.91</b> |
| FGOALS-g3       | 2.36      | <b>1.57</b> | 2.25   | <b>1.19</b> | 1.66 | <b>1.24</b> | 1.94 | <b>1.16</b> |
| GFDL-ESM4       | 0.98      | <b>0.64</b> | 2.68   | <b>0.60</b> | 2.40 | <b>0.81</b> | 1.40 | <b>0.62</b> |
| INM-CM5-0       | 1.21      | <b>0.92</b> | 2.64   | <b>0.42</b> | 2.47 | <b>1.63</b> | 1.52 | <b>0.98</b> |
| KACE-1-0-G      | 4.38      | <b>1.29</b> | 1.96   | <b>1.71</b> | 3.52 | <b>0.68</b> | 3.37 | <b>1.09</b> |
| MIROC6          | 1.74      | <b>1.61</b> | 2.73   | <b>1.10</b> | 4.47 | <b>2.22</b> | 2.20 | <b>1.63</b> |
| MPI-ESM1-2-HR   | 2.63      | <b>0.71</b> | 1.48   | <b>0.37</b> | 6.12 | <b>0.64</b> | 2.71 | <b>0.51</b> |
| MPI-ESM1-2-LR   | 1.96      | <b>0.68</b> | 1.98   | <b>0.44</b> | 5.39 | <b>0.62</b> | 1.22 | <b>0.52</b> |
| MRI-ESM2-0      | 2.12      | <b>0.52</b> | 1.52   | <b>0.40</b> | 2.45 | <b>0.71</b> | 1.01 | <b>0.51</b> |
| NorESM2-LM      | 2.99      | <b>1.05</b> | 2.95   | <b>1.31</b> | 5.16 | <b>1.58</b> | 1.91 | <b>1.79</b> |
| average         | 2.30      | <b>1.00</b> | 2.29   | <b>0.83</b> | 3.51 | <b>1.15</b> | 2.17 | <b>1.01</b> |

Table S7: Same as Table S1 for mean of the daily temperature range.

| mean_dtr (°C) |           |             |        |             |      |             |      |             |
|---------------|-----------|-------------|--------|-------------|------|-------------|------|-------------|
|               | Magtogoek |             | Tlichó |             | Ute  |             | Cree |             |
|               | OR        | BA          | OR     | BA          | OR   | BA          | OR   | BA          |
| ACCESS-CM2    | 2.76      | <b>0.09</b> | 2.93   | <b>0.06</b> | 4.70 | <b>0.17</b> | 4.03 | <b>0.24</b> |
| ACCESS-ESM1-5 | 3.34      | <b>0.07</b> | 3.46   | <b>0.11</b> | 3.93 | <b>0.10</b> | 2.84 | <b>0.11</b> |
| BCC-CSM2-MR   | 2.77      | <b>0.07</b> | 1.43   | <b>0.11</b> | 2.71 | <b>0.10</b> | 1.89 | <b>0.08</b> |
| CMCC-ESM2     | 2.39      | <b>0.07</b> | 1.19   | <b>0.06</b> | 4.13 | <b>0.12</b> | 2.97 | <b>0.09</b> |
| CNRM-ESM2-1   | 2.41      | <b>0.08</b> | 1.36   | <b>0.18</b> | 2.76 | <b>0.11</b> | 1.51 | <b>0.07</b> |
| FGOALS-g3     | 2.82      | <b>0.05</b> | 1.64   | <b>0.13</b> | 4.01 | <b>0.11</b> | 2.40 | <b>0.08</b> |
| GFDL-ESM4     | 2.89      | <b>0.06</b> | 1.32   | <b>0.15</b> | 3.61 | <b>0.11</b> | 2.87 | <b>0.12</b> |
| INM-CM5-0     | 2.93      | <b>0.10</b> | 2.18   | <b>0.06</b> | 3.65 | <b>0.16</b> | 2.33 | <b>0.08</b> |
| KACE-1-0-G    | 2.42      | <b>0.17</b> | 1.45   | <b>0.15</b> | 1.58 | <b>0.17</b> | 1.18 | <b>0.19</b> |
| MIROC6        | 2.49      | <b>0.07</b> | 1.79   | <b>0.06</b> | 2.90 | <b>0.17</b> | 2.51 | <b>0.16</b> |
| MPI-ESM1-2-HR | 2.89      | <b>0.06</b> | 1.56   | <b>0.11</b> | 3.77 | <b>0.12</b> | 3.05 | <b>0.08</b> |
| MPI-ESM1-2-LR | 3.03      | <b>0.15</b> | 1.85   | <b>0.11</b> | 4.15 | <b>0.23</b> | 3.26 | <b>0.12</b> |
| MRI-ESM2-0    | 2.60      | <b>0.10</b> | 1.48   | <b>0.20</b> | 5.40 | <b>0.14</b> | 4.07 | <b>0.13</b> |
| NorESM2-LM    | 2.53      | <b>0.06</b> | 3.06   | <b>0.06</b> | 4.59 | <b>0.11</b> | 3.20 | <b>0.07</b> |
| average       | 2.73      | <b>0.09</b> | 1.91   | <b>0.11</b> | 3.71 | <b>0.14</b> | 2.72 | <b>0.12</b> |

Table S8: Same as Table S1 for the 99th percentile of the daily temperature range.

| q99_dtr (°C)  |           |             |        |             |      |             |      |             |
|---------------|-----------|-------------|--------|-------------|------|-------------|------|-------------|
|               | Magtogoek |             | Tlicho |             | Ute  |             | Cree |             |
|               | OR        | BA          | OR     | BA          | OR   | BA          | OR   | BA          |
| ACCESS-CM2    | 4.18      | <b>0.32</b> | 6.17   | <b>0.31</b> | 5.77 | <b>0.31</b> | 6.55 | <b>0.28</b> |
| ACCESS-ESM1-5 | 5.59      | <b>0.26</b> | 7.27   | <b>0.43</b> | 5.34 | <b>0.19</b> | 4.16 | <b>0.20</b> |
| BCC-CSM2-MR   | 4.92      | <b>0.35</b> | 3.56   | <b>0.35</b> | 2.57 | <b>0.22</b> | 1.97 | <b>0.21</b> |
| CMCC-ESM2     | 3.69      | <b>0.29</b> | 2.29   | <b>0.22</b> | 6.13 | <b>0.21</b> | 4.93 | <b>0.31</b> |
| CNRM-ESM2-1   | 4.66      | <b>0.30</b> | 3.20   | <b>0.30</b> | 4.52 | <b>0.24</b> | 3.64 | <b>0.22</b> |
| FGOALS-g3     | 4.00      | <b>0.28</b> | 2.20   | <b>0.31</b> | 6.97 | <b>0.24</b> | 4.20 | <b>0.36</b> |
| GFDL-ESM4     | 4.16      | <b>0.30</b> | 1.74   | <b>0.38</b> | 4.98 | <b>0.22</b> | 4.05 | <b>0.17</b> |
| INM-CM5-0     | 4.16      | <b>0.43</b> | 3.87   | <b>0.27</b> | 3.65 | <b>0.29</b> | 2.50 | <b>0.37</b> |
| KACE-1-0-G    | 3.91      | <b>0.43</b> | 2.36   | <b>0.47</b> | 1.76 | <b>0.34</b> | 2.16 | <b>0.40</b> |
| MIROC6        | 4.02      | <b>0.34</b> | 3.06   | <b>0.24</b> | 3.72 | <b>0.44</b> | 3.52 | <b>0.30</b> |
| MPI-ESM1-2-HR | 4.20      | <b>0.24</b> | 1.81   | <b>0.45</b> | 6.02 | <b>0.46</b> | 5.18 | <b>0.34</b> |
| MPI-ESM1-2-LR | 4.11      | <b>0.41</b> | 1.50   | <b>0.25</b> | 6.60 | <b>0.34</b> | 5.42 | <b>0.39</b> |
| MRI-ESM2-0    | 3.90      | <b>0.30</b> | 2.03   | <b>0.39</b> | 8.03 | <b>0.19</b> | 6.66 | <b>0.22</b> |
| NorESM2-LM    | 4.31      | <b>0.29</b> | 5.40   | <b>0.38</b> | 7.42 | <b>0.22</b> | 4.47 | <b>0.29</b> |
| average       | 4.27      | <b>0.33</b> | 3.32   | <b>0.34</b> | 5.25 | <b>0.28</b> | 4.24 | <b>0.29</b> |

Table S9: Same as Table S1 for the mean of the precipitation.

| mean_pr (mm d <sup>-1</sup> ) |           |             |        |             |      |             |      |             |
|-------------------------------|-----------|-------------|--------|-------------|------|-------------|------|-------------|
|                               | Magtogoek |             | Tlicho |             | Ute  |             | Cree |             |
|                               | OR        | BA          | OR     | BA          | OR   | BA          | OR   | BA          |
| ACCESS-CM2                    | 0.42      | <b>0.08</b> | 0.23   | <b>0.04</b> | 0.59 | <b>0.09</b> | 0.76 | <b>0.05</b> |
| ACCESS-ESM1-5                 | 0.52      | <b>0.10</b> | 0.52   | <b>0.03</b> | 0.36 | <b>0.12</b> | 0.57 | <b>0.05</b> |
| BCC-CSM2-MR                   | 0.30      | <b>0.07</b> | 0.27   | <b>0.03</b> | 0.42 | <b>0.08</b> | 0.31 | <b>0.05</b> |
| CMCC-ESM2                     | 0.27      | <b>0.06</b> | 0.24   | <b>0.04</b> | 0.75 | <b>0.11</b> | 0.37 | <b>0.05</b> |
| CNRM-ESM2-1                   | 0.35      | <b>0.07</b> | 0.30   | <b>0.06</b> | 0.46 | <b>0.09</b> | 0.35 | <b>0.05</b> |
| FGOALS-g3                     | 0.61      | <b>0.07</b> | 0.28   | <b>0.04</b> | 0.98 | <b>0.12</b> | 0.40 | <b>0.04</b> |
| GFDL-ESM4                     | 0.50      | <b>0.06</b> | 0.45   | <b>0.05</b> | 0.35 | <b>0.08</b> | 0.53 | <b>0.04</b> |
| INM-CM5-0                     | 0.48      | <b>0.06</b> | 0.37   | <b>0.04</b> | 0.80 | <b>0.07</b> | 0.54 | <b>0.05</b> |
| KACE-1-0-G                    | 0.37      | <b>0.10</b> | 0.19   | <b>0.03</b> | 0.32 | <b>0.11</b> | 0.32 | <b>0.09</b> |
| MIROC6                        | 0.46      | <b>0.07</b> | 0.25   | <b>0.04</b> | 0.67 | <b>0.07</b> | 0.62 | <b>0.05</b> |
| MPI-ESM1-2-HR                 | 0.47      | <b>0.06</b> | 0.35   | <b>0.03</b> | 0.33 | <b>0.12</b> | 0.38 | <b>0.06</b> |
| MPI-ESM1-2-LR                 | 0.40      | <b>0.07</b> | 0.48   | <b>0.03</b> | 0.49 | <b>0.18</b> | 0.45 | <b>0.07</b> |
| MRI-ESM2-0                    | 0.48      | <b>0.07</b> | 0.20   | <b>0.05</b> | 0.87 | <b>0.10</b> | 0.56 | <b>0.05</b> |
| NorESM2-LM                    | 0.40      | <b>0.10</b> | 0.20   | <b>0.04</b> | 0.47 | <b>0.10</b> | 0.36 | <b>0.07</b> |
| average                       | 0.43      | <b>0.07</b> | 0.31   | <b>0.04</b> | 0.56 | <b>0.10</b> | 0.47 | <b>0.05</b> |



Table S10: Same as Table S1 for the 95th percentile of precipitation.

| q95_pr (mm d <sup>-1</sup> ) |           |             |        |             |      |             |      |             |
|------------------------------|-----------|-------------|--------|-------------|------|-------------|------|-------------|
|                              | Magtogoek |             | Tlicho |             | Ute  |             | Cree |             |
|                              | OR        | BA          | OR     | BA          | OR   | BA          | OR   | BA          |
| ACCESS-CM2                   | 1.57      | <b>0.45</b> | 0.93   | <b>0.24</b> | 2.30 | <b>0.44</b> | 3.05 | <b>0.25</b> |
| ACCESS-ESM1-5                | 1.55      | <b>0.51</b> | 1.78   | <b>0.21</b> | 1.93 | <b>0.53</b> | 1.91 | <b>0.25</b> |
| BCC-CSM2-MR                  | 2.38      | <b>0.41</b> | 1.28   | <b>0.14</b> | 2.81 | <b>0.56</b> | 1.61 | <b>0.28</b> |
| CMCC-ESM2                    | 1.74      | <b>0.37</b> | 0.89   | <b>0.17</b> | 2.85 | <b>0.58</b> | 1.53 | <b>0.27</b> |
| CNRM-ESM2-1                  | 1.47      | <b>0.36</b> | 1.19   | <b>0.28</b> | 2.10 | <b>0.37</b> | 1.58 | <b>0.30</b> |
| FGOALS-g3                    | 3.83      | <b>0.34</b> | 1.54   | <b>0.23</b> | 4.31 | <b>0.65</b> | 2.91 | <b>0.27</b> |
| GFDL-ESM4                    | 1.70      | <b>0.36</b> | 1.27   | <b>0.28</b> | 1.69 | <b>0.53</b> | 1.60 | <b>0.26</b> |
| INM-CM5-0                    | 2.08      | <b>0.36</b> | 1.22   | <b>0.19</b> | 2.80 | <b>0.36</b> | 1.23 | <b>0.27</b> |
| KACE-1-0-G                   | 1.71      | <b>0.47</b> | 0.80   | <b>0.18</b> | 2.30 | <b>0.63</b> | 1.79 | <b>0.48</b> |
| MIROC6                       | 1.62      | <b>0.35</b> | 0.81   | <b>0.22</b> | 2.38 | <b>0.34</b> | 1.73 | <b>0.27</b> |
| MPI-ESM1-2-HR                | 1.93      | <b>0.40</b> | 1.46   | <b>0.17</b> | 2.01 | <b>0.54</b> | 1.45 | <b>0.34</b> |
| MPI-ESM1-2-LR                | 1.90      | <b>0.36</b> | 1.78   | <b>0.17</b> | 2.36 | <b>0.75</b> | 1.72 | <b>0.31</b> |
| MRI-ESM2-0                   | 1.64      | <b>0.38</b> | 0.65   | <b>0.28</b> | 2.74 | <b>0.49</b> | 1.71 | <b>0.28</b> |
| NorESM2-LM                   | 2.47      | <b>0.38</b> | 0.98   | <b>0.18</b> | 3.68 | <b>0.48</b> | 2.23 | <b>0.28</b> |
| average                      | 1.97      | <b>0.39</b> | 1.18   | <b>0.21</b> | 2.59 | <b>0.52</b> | 1.86 | <b>0.29</b> |

Table S11: Same as Table S1 for the 99th percentile of precipitation.

| q99_pr (mm d <sup>-1</sup> ) |           |             |        |             |       |             |      |             |
|------------------------------|-----------|-------------|--------|-------------|-------|-------------|------|-------------|
|                              | Magtogoek |             | Tlicho |             | Ute   |             | Cree |             |
|                              | OR        | BA          | OR     | BA          | OR    | BA          | OR   | BA          |
| ACCESS-CM2                   | 3.02      | <b>1.19</b> | 1.92   | <b>0.77</b> | 4.24  | <b>1.23</b> | 5.30 | <b>0.85</b> |
| ACCESS-ESM1-5                | 3.64      | <b>1.34</b> | 2.60   | <b>0.58</b> | 6.86  | <b>1.56</b> | 2.80 | <b>0.98</b> |
| BCC-CSM2-MR                  | 4.94      | <b>1.06</b> | 4.16   | <b>0.73</b> | 6.84  | <b>1.11</b> | 5.48 | <b>1.06</b> |
| CMCC-ESM2                    | 4.12      | <b>1.18</b> | 1.61   | <b>0.67</b> | 8.66  | <b>1.59</b> | 4.93 | <b>0.87</b> |
| CNRM-ESM2-1                  | 3.99      | <b>1.10</b> | 2.15   | <b>0.86</b> | 5.59  | <b>1.18</b> | 4.08 | <b>1.03</b> |
| FGOALS-g3                    | 8.45      | <b>1.09</b> | 5.63   | <b>0.75</b> | 10.92 | <b>1.73</b> | 9.59 | <b>1.01</b> |
| GFDL-ESM4                    | 3.51      | <b>1.13</b> | 1.90   | <b>0.84</b> | 3.86  | <b>1.13</b> | 2.57 | <b>0.77</b> |
| INM-CM5-0                    | 3.70      | <b>1.08</b> | 2.55   | <b>0.79</b> | 5.77  | <b>1.16</b> | 2.59 | <b>0.97</b> |
| KACE-1-0-G                   | 4.16      | <b>1.12</b> | 2.71   | <b>0.67</b> | 7.03  | <b>1.51</b> | 5.25 | <b>1.44</b> |
| MIROC6                       | 2.65      | <b>1.28</b> | 2.30   | <b>0.68</b> | 5.03  | <b>0.96</b> | 2.64 | <b>0.88</b> |
| MPI-ESM1-2-HR                | 3.86      | <b>1.18</b> | 1.78   | <b>0.65</b> | 6.31  | <b>1.60</b> | 2.53 | <b>0.88</b> |
| MPI-ESM1-2-LR                | 5.47      | <b>1.09</b> | 2.81   | <b>0.65</b> | 8.72  | <b>2.10</b> | 3.74 | <b>0.99</b> |
| MRI-ESM2-0                   | 4.11      | <b>1.23</b> | 3.00   | <b>0.87</b> | 5.87  | <b>1.24</b> | 2.67 | <b>0.88</b> |
| NorESM2-LM                   | 8.03      | <b>1.23</b> | 4.14   | <b>0.76</b> | 12.87 | <b>1.37</b> | 8.44 | <b>0.88</b> |
| average                      | 4.55      | <b>1.16</b> | 2.81   | <b>0.73</b> | 7.04  | <b>1.39</b> | 4.47 | <b>0.96</b> |

Table S12: Same as Table S1 for dry spell frequency.

| dry_spell_freq |           |             |        |             |      |             |      |             |
|----------------|-----------|-------------|--------|-------------|------|-------------|------|-------------|
|                | Magtogoek |             | Tlichó |             | Ute  |             | Cree |             |
|                | OR        | BA          | OR     | BA          | OR   | BA          | OR   | BA          |
| ACCESS-CM2     | 0.07      | <b>0.02</b> | 0.05   | <b>0.02</b> | 0.13 | <b>0.01</b> | 0.13 | <b>0.01</b> |
| ACCESS-ESM1-5  | 0.11      | <b>0.01</b> | 0.13   | <b>0.01</b> | 0.13 | <b>0.02</b> | 0.14 | <b>0.01</b> |
| BCC-CSM2-MR    | 0.06      | <b>0.02</b> | 0.09   | <b>0.01</b> | 0.09 | <b>0.01</b> | 0.11 | <b>0.01</b> |
| CMCC-ESM2      | 0.05      | <b>0.02</b> | 0.07   | <b>0.01</b> | 0.20 | <b>0.01</b> | 0.12 | <b>0.01</b> |
| CNRM-ESM2-1    | 0.05      | <b>0.02</b> | 0.06   | <b>0.02</b> | 0.09 | <b>0.01</b> | 0.06 | <b>0.01</b> |
| FGOALS-g3      | 0.07      | <b>0.02</b> | 0.08   | <b>0.01</b> | 0.22 | <b>0.01</b> | 0.11 | <b>0.01</b> |
| GFDL-ESM4      | 0.11      | <b>0.01</b> | 0.14   | <b>0.01</b> | 0.09 | <b>0.01</b> | 0.13 | <b>0.01</b> |
| INM-CM5-0      | 0.11      | <b>0.01</b> | 0.11   | <b>0.01</b> | 0.23 | <b>0.01</b> | 0.18 | <b>0.00</b> |
| KACE-1-0-G     | 0.05      | <b>0.03</b> | 0.04   | <b>0.01</b> | 0.08 | <b>0.02</b> | 0.06 | <b>0.01</b> |
| MIROC6         | 0.08      | <b>0.01</b> | 0.09   | <b>0.01</b> | 0.18 | <b>0.01</b> | 0.16 | <b>0.01</b> |
| MPI-ESM1-2-HR  | 0.07      | <b>0.01</b> | 0.09   | <b>0.01</b> | 0.07 | <b>0.02</b> | 0.08 | <b>0.01</b> |
| MPI-ESM1-2-LR  | 0.08      | <b>0.01</b> | 0.13   | <b>0.01</b> | 0.13 | <b>0.03</b> | 0.12 | <b>0.01</b> |
| MRI-ESM2-0     | 0.10      | <b>0.01</b> | 0.07   | <b>0.01</b> | 0.20 | <b>0.01</b> | 0.15 | <b>0.01</b> |
| NorESM2-LM     | 0.05      | <b>0.02</b> | 0.08   | <b>0.01</b> | 0.10 | <b>0.02</b> | 0.09 | <b>0.01</b> |
| average        | 0.07      | <b>0.02</b> | 0.09   | <b>0.01</b> | 0.14 | <b>0.01</b> | 0.12 | <b>0.01</b> |

Table S13: Same as Table S1 for amplitude of the annual cycle of the daily maximum temperature.

| aca_tasmax (°C) |           |             |        |             |       |             |      |             |
|-----------------|-----------|-------------|--------|-------------|-------|-------------|------|-------------|
|                 | Magtogoek |             | Tlichó |             | Ute   |             | Cree |             |
|                 | OR        | BA          | OR     | BA          | OR    | BA          | OR   | BA          |
| ACCESS-CM2      | 7.14      | <b>0.23</b> | 3.85   | <b>0.75</b> | 5.21  | <b>0.35</b> | 2.32 | <b>0.55</b> |
| ACCESS-ESM1-5   | 5.43      | <b>0.32</b> | 3.77   | <b>0.66</b> | 4.51  | <b>0.36</b> | 2.95 | <b>0.60</b> |
| BCC-CSM2-MR     | 8.94      | <b>0.22</b> | 8.03   | <b>1.56</b> | 8.64  | <b>0.27</b> | 4.39 | <b>0.80</b> |
| CMCC-ESM2       | 4.86      | <b>0.74</b> | 4.36   | <b>0.49</b> | 2.88  | <b>0.60</b> | 3.88 | <b>0.45</b> |
| CNRM-ESM2-1     | 3.95      | <b>0.33</b> | 4.68   | <b>0.29</b> | 3.46  | <b>0.46</b> | 4.97 | <b>0.33</b> |
| FGOALS-g3       | 7.97      | <b>0.44</b> | 4.31   | <b>0.65</b> | 5.42  | <b>0.52</b> | 5.79 | <b>1.00</b> |
| GFDL-ESM4       | 2.52      | <b>0.49</b> | 6.02   | <b>0.96</b> | 4.03  | <b>0.41</b> | 1.80 | <b>0.52</b> |
| INM-CM5-0       | 4.00      | <b>0.60</b> | 2.92   | <b>1.33</b> | 4.44  | <b>0.24</b> | 4.30 | <b>0.42</b> |
| KACE-1-0-G      | 9.77      | <b>0.80</b> | 5.78   | <b>0.73</b> | 11.05 | <b>0.35</b> | 9.76 | <b>1.67</b> |
| MIROC6          | 3.66      | <b>0.28</b> | 4.57   | <b>0.93</b> | 9.80  | <b>0.77</b> | 3.89 | <b>0.89</b> |
| MPI-ESM1-2-HR   | 4.94      | <b>0.27</b> | 3.48   | <b>0.48</b> | 4.20  | <b>0.48</b> | 1.52 | <b>0.83</b> |
| MPI-ESM1-2-LR   | 4.19      | <b>0.32</b> | 4.84   | <b>0.67</b> | 3.79  | <b>0.30</b> | 2.80 | <b>0.65</b> |
| MRI-ESM2-0      | 4.50      | <b>0.63</b> | 5.29   | <b>0.82</b> | 2.38  | <b>0.69</b> | 5.74 | <b>0.35</b> |
| NorESM2-LM      | 5.04      | <b>0.29</b> | 8.67   | <b>0.87</b> | 5.60  | <b>0.34</b> | 3.18 | <b>0.63</b> |
| average         | 5.49      | <b>0.42</b> | 5.04   | <b>0.80</b> | 5.39  | <b>0.44</b> | 4.09 | <b>0.69</b> |

Table S14: Same as Table S1 for the amplitude of the annual cycle of the daily minimum temperature.

| aca_tasmin (°C) |           |             |        |             |      |             |      |             |
|-----------------|-----------|-------------|--------|-------------|------|-------------|------|-------------|
|                 | Magtogoek |             | Tlichó |             | Ute  |             | Cree |             |
|                 | OR        | BA          | OR     | BA          | OR   | BA          | OR   | BA          |
| ACCESS-CM2      | 4.84      | <b>0.37</b> | 2.69   | <b>0.63</b> | 2.68 | <b>0.57</b> | 3.63 | <b>0.49</b> |
| ACCESS-ESM1-5   | 4.10      | <b>0.53</b> | 2.75   | <b>0.54</b> | 2.96 | <b>0.38</b> | 2.38 | <b>0.26</b> |
| BCC-CSM2-MR     | 5.15      | <b>0.31</b> | 5.38   | <b>1.16</b> | 2.55 | <b>0.52</b> | 2.04 | <b>0.79</b> |
| CMCC-ESM2       | 5.09      | <b>1.01</b> | 4.42   | <b>0.32</b> | 2.36 | <b>0.66</b> | 3.33 | <b>0.60</b> |
| CNRM-ESM2-1     | 3.46      | <b>0.32</b> | 4.36   | <b>0.29</b> | 1.80 | <b>0.41</b> | 3.04 | <b>0.46</b> |
| FGOALS-g3       | 6.68      | <b>0.40</b> | 3.39   | <b>0.63</b> | 2.06 | <b>0.45</b> | 3.14 | <b>0.88</b> |
| GFDL-ESM4       | 2.09      | <b>0.58</b> | 4.96   | <b>0.83</b> | 2.41 | <b>0.41</b> | 3.26 | <b>0.39</b> |
| INM-CM5-0       | 5.35      | <b>0.94</b> | 2.56   | <b>1.38</b> | 3.50 | <b>0.49</b> | 2.11 | <b>0.98</b> |
| KACE-1-0-G      | 7.97      | <b>0.89</b> | 6.14   | <b>0.60</b> | 3.62 | <b>0.59</b> | 4.11 | <b>1.27</b> |
| MIROC6          | 2.46      | <b>0.60</b> | 3.74   | <b>0.82</b> | 2.53 | <b>0.54</b> | 2.37 | <b>0.67</b> |
| MPI-ESM1-2-HR   | 5.74      | <b>0.36</b> | 2.59   | <b>0.40</b> | 3.49 | <b>0.55</b> | 1.51 | <b>0.70</b> |
| MPI-ESM1-2-LR   | 5.45      | <b>0.31</b> | 2.24   | <b>0.48</b> | 2.68 | <b>0.68</b> | 2.51 | <b>0.47</b> |
| MRI-ESM2-0      | 3.93      | <b>0.55</b> | 6.80   | <b>0.94</b> | 4.08 | <b>0.55</b> | 7.04 | <b>0.50</b> |
| NorESM2-LM      | 4.29      | <b>0.37</b> | 8.25   | <b>0.81</b> | 2.15 | <b>0.47</b> | 3.47 | <b>1.00</b> |
| average         | 4.76      | <b>0.54</b> | 4.31   | <b>0.70</b> | 2.78 | <b>0.52</b> | 3.14 | <b>0.68</b> |

Table S15: Same as Table S1 for relative amplitude of the annual cycle of the precipitation.

| aca_pr (%)    |           |              |        |              |       |              |        |              |
|---------------|-----------|--------------|--------|--------------|-------|--------------|--------|--------------|
|               | Magtogoek |              | Tlichó |              | Ute   |              | Cree   |              |
|               | OR        | BA           | OR     | BA           | OR    | BA           | OR     | BA           |
| ACCESS-CM2    | 26.33     | <b>9.82</b>  | 42.07  | <b>16.71</b> | 41.58 | <b>13.82</b> | 25.81  | <b>21.68</b> |
| ACCESS-ESM1-5 | 19.07     | <b>9.78</b>  | 40.81  | <b>12.65</b> | 38.08 | <b>12.34</b> | 38.54  | <b>15.57</b> |
| BCC-CSM2-MR   | 24.05     | <b>11.13</b> | 68.26  | <b>18.22</b> | 65.75 | <b>12.73</b> | 94.04  | <b>15.21</b> |
| CMCC-ESM2     | 17.11     | <b>8.90</b>  | 30.56  | <b>10.73</b> | 31.99 | <b>12.34</b> | 36.70  | <b>15.01</b> |
| CNRM-ESM2-1   | 19.69     | <b>12.65</b> | 34.35  | <b>17.36</b> | 38.56 | <b>14.56</b> | 62.83  | <b>27.60</b> |
| FGOALS-g3     | 19.74     | <b>8.92</b>  | 73.05  | <b>12.18</b> | 34.69 | <b>11.59</b> | 118.25 | <b>17.75</b> |
| GFDL-ESM4     | 17.53     | <b>11.05</b> | 32.60  | <b>9.28</b>  | 27.94 | <b>12.32</b> | 45.78  | <b>14.53</b> |
| INM-CM5-0     | 15.79     | <b>7.99</b>  | 36.21  | <b>11.30</b> | 35.71 | <b>17.18</b> | 52.63  | <b>17.95</b> |
| KACE-1-0-G    | 19.32     | <b>11.38</b> | 32.20  | <b>11.20</b> | 41.49 | <b>13.85</b> | 47.08  | <b>16.28</b> |
| MIROC6        | 20.64     | <b>7.34</b>  | 55.32  | <b>12.79</b> | 40.47 | <b>11.60</b> | 65.83  | <b>17.99</b> |
| MPI-ESM1-2-HR | 19.38     | <b>10.64</b> | 25.85  | <b>12.87</b> | 49.53 | <b>15.44</b> | 25.56  | <b>13.74</b> |
| MPI-ESM1-2-LR | 21.15     | <b>11.94</b> | 35.03  | <b>10.57</b> | 57.48 | <b>15.75</b> | 33.64  | <b>18.11</b> |
| MRI-ESM2-0    | 21.03     | <b>8.05</b>  | 39.20  | <b>15.87</b> | 28.85 | <b>16.13</b> | 42.92  | <b>20.31</b> |
| NorESM2-LM    | 16.82     | <b>10.27</b> | 34.64  | <b>14.64</b> | 36.38 | <b>10.88</b> | 35.87  | <b>15.56</b> |
| average       | 19.83     | <b>9.99</b>  | 41.44  | <b>13.31</b> | 40.61 | <b>13.61</b> | 51.82  | <b>17.66</b> |

Table S16: Same as Table S1 for the maximum length of the warm spell.

| max_warm_spell (days) |           |              |              |              |              |              |             |              |
|-----------------------|-----------|--------------|--------------|--------------|--------------|--------------|-------------|--------------|
|                       | Magtogoek |              | Tlicho       |              | Ute          |              | Cree        |              |
|                       | OR        | BA           | OR           | BA           | OR           | BA           | OR          | BA           |
| ACCESS-CM2            | 14.56     | <b>11.71</b> | <b>6.78</b>  | 7.56         | 12.47        | <b>8.67</b>  | 15.92       | <b>11.16</b> |
| ACCESS-ESM1-5         | 16.97     | <b>14.91</b> | <b>7.38</b>  | 7.84         | 20.26        | <b>16.88</b> | 20.50       | <b>19.60</b> |
| BCC-CSM2-MR           | 17.21     | <b>15.32</b> | <b>7.94</b>  | 10.33        | 10.03        | <b>8.84</b>  | 7.76        | <b>7.56</b>  |
| CMCC-ESM2             | 14.94     | <b>11.73</b> | <b>10.87</b> | 12.26        | 14.96        | <b>12.91</b> | 12.65       | <b>9.27</b>  |
| CNRM-ESM2-1           | 18.88     | <b>16.99</b> | 11.51        | <b>11.18</b> | 22.75        | <b>18.51</b> | 12.72       | <b>11.55</b> |
| FGOALS-g3             | 13.97     | <b>11.51</b> | <b>10.74</b> | 10.88        | 17.19        | <b>12.16</b> | 12.28       | <b>8.36</b>  |
| GFDL-ESM4             | 16.23     | <b>14.11</b> | 9.24         | <b>8.78</b>  | <b>14.82</b> | 18.83        | 10.53       | <b>9.15</b>  |
| INM-CM5-0             | 15.89     | <b>13.63</b> | <b>11.08</b> | 11.29        | 26.69        | <b>13.46</b> | 14.06       | <b>8.87</b>  |
| KACE-1-0-G            | 14.43     | <b>12.29</b> | <b>9.38</b>  | 9.55         | 16.99        | <b>12.90</b> | 14.59       | <b>9.46</b>  |
| MIROC6                | 14.17     | <b>13.26</b> | 20.40        | <b>18.95</b> | 9.25         | <b>8.70</b>  | 11.38       | <b>8.92</b>  |
| MPI-ESM1-2-HR         | 15.51     | <b>13.72</b> | 14.74        | <b>13.92</b> | 23.09        | <b>20.64</b> | 18.08       | <b>14.88</b> |
| MPI-ESM1-2-LR         | 15.80     | <b>14.03</b> | 14.49        | <b>12.70</b> | 18.36        | <b>16.02</b> | 18.47       | <b>16.57</b> |
| MRI-ESM2-0            | 14.27     | <b>11.69</b> | 8.82         | <b>7.46</b>  | <b>11.48</b> | 12.51        | 16.68       | <b>12.85</b> |
| NorESM2-LM            | 19.39     | <b>15.13</b> | <b>6.59</b>  | 9.25         | 11.78        | <b>8.88</b>  | <b>8.11</b> | 8.53         |
| average               | 15.87     | <b>13.57</b> | <b>10.71</b> | 10.85        | 16.44        | <b>13.57</b> | 13.84       | <b>11.20</b> |

Table S17: Same as Table S1 for wet-wet transition.

| wet_wet       |           |             |        |             |      |             |      |             |
|---------------|-----------|-------------|--------|-------------|------|-------------|------|-------------|
|               | Magtogoek |             | Tlicho |             | Ute  |             | Cree |             |
|               | OR        | BA          | OR     | BA          | OR   | BA          | OR   | BA          |
| ACCESS-CM2    | 0.06      | <b>0.02</b> | 0.05   | <b>0.01</b> | 0.10 | <b>0.01</b> | 0.09 | <b>0.01</b> |
| ACCESS-ESM1-5 | 0.10      | <b>0.01</b> | 0.12   | <b>0.01</b> | 0.11 | <b>0.01</b> | 0.10 | <b>0.01</b> |
| BCC-CSM2-MR   | 0.05      | <b>0.02</b> | 0.07   | <b>0.01</b> | 0.07 | <b>0.01</b> | 0.07 | <b>0.01</b> |
| CMCC-ESM2     | 0.05      | <b>0.02</b> | 0.05   | <b>0.01</b> | 0.20 | <b>0.01</b> | 0.09 | <b>0.01</b> |
| CNRM-ESM2-1   | 0.05      | <b>0.01</b> | 0.05   | <b>0.01</b> | 0.09 | <b>0.01</b> | 0.05 | <b>0.01</b> |
| FGOALS-g3     | 0.06      | <b>0.02</b> | 0.07   | <b>0.01</b> | 0.20 | <b>0.01</b> | 0.08 | <b>0.01</b> |
| GFDL-ESM4     | 0.09      | <b>0.01</b> | 0.12   | <b>0.01</b> | 0.08 | <b>0.01</b> | 0.10 | <b>0.00</b> |
| INM-CM5-0     | 0.10      | <b>0.01</b> | 0.10   | <b>0.01</b> | 0.22 | <b>0.01</b> | 0.14 | <b>0.01</b> |
| KACE-1-0-G    | 0.05      | <b>0.02</b> | 0.04   | <b>0.01</b> | 0.07 | <b>0.01</b> | 0.05 | <b>0.01</b> |
| MIROC6        | 0.07      | <b>0.01</b> | 0.07   | <b>0.01</b> | 0.15 | <b>0.01</b> | 0.12 | <b>0.01</b> |
| MPI-ESM1-2-HR | 0.06      | <b>0.01</b> | 0.07   | <b>0.01</b> | 0.06 | <b>0.01</b> | 0.06 | <b>0.01</b> |
| MPI-ESM1-2-LR | 0.07      | <b>0.02</b> | 0.11   | <b>0.01</b> | 0.12 | <b>0.01</b> | 0.09 | <b>0.01</b> |
| MRI-ESM2-0    | 0.09      | <b>0.02</b> | 0.07   | <b>0.01</b> | 0.17 | <b>0.01</b> | 0.11 | <b>0.01</b> |
| NorESM2-LM    | 0.05      | <b>0.03</b> | 0.07   | <b>0.01</b> | 0.09 | <b>0.01</b> | 0.07 | <b>0.01</b> |
| average       | 0.07      | <b>0.02</b> | 0.08   | <b>0.01</b> | 0.12 | <b>0.01</b> | 0.09 | <b>0.01</b> |

Table S18: Same as Table S1 for the dry-wet transition.

| dry_wet       |             |             |        |             |             |             |      |             |
|---------------|-------------|-------------|--------|-------------|-------------|-------------|------|-------------|
|               | Magtogoek   |             | Tlichó |             | Ute         |             | Cree |             |
|               | OR          | BA          | OR     | BA          | OR          | BA          | OR   | BA          |
| ACCESS-CM2    | 0.01        | <b>0.01</b> | 0.01   | <b>0.01</b> | 0.03        | <b>0.01</b> | 0.04 | <b>0.01</b> |
| ACCESS-ESM1-5 | 0.01        | <b>0.01</b> | 0.02   | <b>0.01</b> | 0.02        | <b>0.01</b> | 0.04 | <b>0.01</b> |
| BCC-CSM2-MR   | 0.02        | <b>0.01</b> | 0.02   | <b>0.00</b> | 0.02        | <b>0.01</b> | 0.04 | <b>0.01</b> |
| CMCC-ESM2     | 0.01        | <b>0.01</b> | 0.02   | <b>0.00</b> | <b>0.01</b> | 0.01        | 0.03 | <b>0.01</b> |
| CNRM-ESM2-1   | <b>0.01</b> | 0.01        | 0.01   | <b>0.01</b> | 0.02        | <b>0.01</b> | 0.01 | <b>0.01</b> |
| FGOALS-g3     | <b>0.01</b> | 0.01        | 0.01   | <b>0.01</b> | 0.03        | <b>0.01</b> | 0.04 | <b>0.01</b> |
| GFDL-ESM4     | 0.02        | <b>0.01</b> | 0.03   | <b>0.00</b> | 0.02        | <b>0.01</b> | 0.04 | <b>0.01</b> |
| INM-CM5-0     | 0.01        | <b>0.01</b> | 0.02   | <b>0.01</b> | 0.02        | <b>0.01</b> | 0.05 | <b>0.01</b> |
| KACE-1-0-G    | <b>0.01</b> | 0.01        | 0.01   | <b>0.01</b> | 0.02        | <b>0.01</b> | 0.02 | <b>0.01</b> |
| MIROC6        | 0.01        | <b>0.01</b> | 0.02   | <b>0.00</b> | 0.03        | <b>0.01</b> | 0.05 | <b>0.01</b> |
| MPI-ESM1-2-HR | 0.01        | <b>0.01</b> | 0.02   | <b>0.01</b> | <b>0.01</b> | 0.01        | 0.03 | <b>0.01</b> |
| MPI-ESM1-2-LR | 0.01        | <b>0.00</b> | 0.02   | <b>0.01</b> | <b>0.02</b> | 0.02        | 0.03 | <b>0.01</b> |
| MRI-ESM2-0    | 0.01        | <b>0.01</b> | 0.01   | <b>0.01</b> | 0.03        | <b>0.01</b> | 0.04 | <b>0.01</b> |
| NorESM2-LM    | 0.01        | <b>0.01</b> | 0.02   | <b>0.00</b> | <b>0.01</b> | 0.02        | 0.02 | <b>0.01</b> |
| average       | 0.01        | <b>0.01</b> | 0.02   | <b>0.01</b> | 0.02        | <b>0.01</b> | 0.03 | <b>0.01</b> |

Table S19: Same as Table S1 for the maximum length of dry spell.

| max_dry_spell (days) |             |             |              |              |              |              |              |              |
|----------------------|-------------|-------------|--------------|--------------|--------------|--------------|--------------|--------------|
|                      | Magtogoek   |             | Tlichó       |              | Ute          |              | Cree         |              |
|                      | OR          | BA          | OR           | BA           | OR           | BA           | OR           | BA           |
| ACCESS-CM2           | <b>6.87</b> | 6.98        | 17.24        | <b>15.93</b> | 25.93        | <b>14.98</b> | 26.35        | <b>15.86</b> |
| ACCESS-ESM1-5        | 7.94        | <b>7.13</b> | 17.15        | <b>14.63</b> | 21.16        | <b>13.80</b> | 26.68        | <b>13.90</b> |
| BCC-CSM2-MR          | 7.66        | <b>7.28</b> | 20.87        | <b>14.02</b> | 19.58        | <b>14.65</b> | 27.74        | <b>15.00</b> |
| CMCC-ESM2            | 7.32        | <b>7.28</b> | 16.76        | <b>15.87</b> | 21.20        | <b>18.19</b> | 23.80        | <b>15.77</b> |
| CNRM-ESM2-1          | <b>8.36</b> | 9.22        | <b>20.01</b> | 20.01        | <b>15.74</b> | 18.17        | <b>16.00</b> | 16.57        |
| FGOALS-g3            | 7.86        | <b>6.61</b> | 18.79        | <b>13.93</b> | 26.80        | <b>15.62</b> | 25.06        | <b>15.53</b> |
| GFDL-ESM4            | 8.39        | <b>6.78</b> | 21.67        | <b>16.70</b> | 17.76        | <b>15.72</b> | 25.03        | <b>12.25</b> |
| INM-CM5-0            | 7.72        | <b>6.65</b> | 19.66        | <b>13.62</b> | 28.94        | <b>14.63</b> | 30.05        | <b>14.71</b> |
| KACE-1-0-G           | <b>7.34</b> | 8.72        | 15.93        | <b>14.47</b> | 21.45        | <b>18.15</b> | 18.48        | <b>17.46</b> |
| MIROC6               | 7.97        | <b>7.04</b> | 21.45        | <b>14.53</b> | 27.61        | <b>14.65</b> | 28.66        | <b>16.98</b> |
| MPI-ESM1-2-HR        | 7.43        | <b>6.73</b> | 16.61        | <b>14.47</b> | <b>21.73</b> | 22.19        | 21.60        | <b>19.12</b> |
| MPI-ESM1-2-LR        | <b>7.41</b> | 7.42        | 22.11        | <b>15.34</b> | 30.63        | <b>29.87</b> | 23.38        | <b>20.36</b> |
| MRI-ESM2-0           | 8.64        | <b>7.08</b> | 15.75        | <b>14.37</b> | 27.91        | <b>14.46</b> | 28.53        | <b>16.71</b> |
| NorESM2-LM           | 6.41        | <b>6.33</b> | 16.11        | <b>15.45</b> | 18.62        | <b>15.32</b> | 21.96        | <b>16.04</b> |
| average              | 7.67        | <b>7.23</b> | 18.58        | <b>15.24</b> | 23.22        | <b>17.17</b> | 24.52        | <b>16.16</b> |

Table S20: Same as Table S1 for correlation between daily maximum temperature and daily minimum temperature.

| corr_tasmax_tasmin |           |             |        |             |      |             |      |             |
|--------------------|-----------|-------------|--------|-------------|------|-------------|------|-------------|
|                    | Magtogoek |             | Tlicho |             | Ute  |             | Cree |             |
|                    | OR        | BA          | OR     | BA          | OR   | BA          | OR   | BA          |
| ACCESS-CM2         | 0.03      | <b>0.01</b> | 0.02   | <b>0.00</b> | 0.05 | <b>0.01</b> | 0.03 | <b>0.00</b> |
| ACCESS-ESM1-5      | 0.03      | <b>0.00</b> | 0.02   | <b>0.00</b> | 0.05 | <b>0.01</b> | 0.04 | <b>0.00</b> |
| BCC-CSM2-MR        | 0.02      | <b>0.00</b> | 0.01   | <b>0.00</b> | 0.05 | <b>0.01</b> | 0.03 | <b>0.01</b> |
| CMCC-ESM2          | 0.02      | <b>0.00</b> | 0.01   | <b>0.00</b> | 0.04 | <b>0.01</b> | 0.03 | <b>0.00</b> |
| CNRM-ESM2-1        | 0.03      | <b>0.00</b> | 0.02   | <b>0.00</b> | 0.04 | <b>0.01</b> | 0.03 | <b>0.00</b> |
| FGOALS-g3          | 0.03      | <b>0.00</b> | 0.02   | <b>0.00</b> | 0.06 | <b>0.01</b> | 0.04 | <b>0.01</b> |
| GFDL-ESM4          | 0.03      | <b>0.00</b> | 0.01   | <b>0.00</b> | 0.04 | <b>0.00</b> | 0.02 | <b>0.00</b> |
| INM-CM5-0          | 0.04      | <b>0.01</b> | 0.02   | <b>0.00</b> | 0.05 | <b>0.01</b> | 0.03 | <b>0.00</b> |
| KACE-1-0-G         | 0.03      | <b>0.01</b> | 0.02   | <b>0.00</b> | 0.04 | <b>0.01</b> | 0.03 | <b>0.01</b> |
| MIROC6             | 0.02      | <b>0.00</b> | 0.01   | <b>0.00</b> | 0.05 | <b>0.01</b> | 0.03 | <b>0.00</b> |
| MPI-ESM1-2-HR      | 0.03      | <b>0.00</b> | 0.01   | <b>0.00</b> | 0.05 | <b>0.01</b> | 0.03 | <b>0.00</b> |
| MPI-ESM1-2-LR      | 0.03      | <b>0.00</b> | 0.01   | <b>0.00</b> | 0.05 | <b>0.00</b> | 0.03 | <b>0.00</b> |
| MRI-ESM2-0         | 0.03      | <b>0.00</b> | 0.01   | <b>0.00</b> | 0.05 | <b>0.00</b> | 0.03 | <b>0.00</b> |
| NorESM2-LM         | 0.03      | <b>0.00</b> | 0.02   | <b>0.00</b> | 0.07 | <b>0.01</b> | 0.04 | <b>0.01</b> |
| average            | 0.03      | <b>0.00</b> | 0.01   | <b>0.00</b> | 0.05 | <b>0.01</b> | 0.03 | <b>0.00</b> |

Table S21: Same as Table S1 for the correlation between the daily maximum temperature and precipitation.

| corr_tasmax_pr |           |             |        |             |      |             |      |             |
|----------------|-----------|-------------|--------|-------------|------|-------------|------|-------------|
|                | Magtogoek |             | Tlicho |             | Ute  |             | Cree |             |
|                | OR        | BA          | OR     | BA          | OR   | BA          | OR   | BA          |
| ACCESS-CM2     | 0.30      | <b>0.15</b> | 0.38   | <b>0.09</b> | 0.11 | <b>0.05</b> | 0.23 | <b>0.08</b> |
| ACCESS-ESM1-5  | 0.17      | <b>0.11</b> | 0.45   | <b>0.07</b> | 0.20 | <b>0.06</b> | 0.07 | <b>0.03</b> |
| BCC-CSM2-MR    | 0.09      | <b>0.04</b> | 0.22   | <b>0.04</b> | 0.09 | <b>0.04</b> | 0.06 | <b>0.02</b> |
| CMCC-ESM2      | 0.12      | <b>0.03</b> | 0.24   | <b>0.03</b> | 0.28 | <b>0.08</b> | 0.17 | <b>0.05</b> |
| CNRM-ESM2-1    | 0.11      | <b>0.03</b> | 0.09   | <b>0.04</b> | 0.10 | <b>0.05</b> | 0.17 | <b>0.11</b> |
| FGOALS-g3      | 0.15      | <b>0.05</b> | 0.14   | <b>0.03</b> | 0.30 | <b>0.10</b> | 0.14 | <b>0.09</b> |
| GFDL-ESM4      | 0.17      | <b>0.07</b> | 0.27   | <b>0.04</b> | 0.11 | <b>0.05</b> | 0.11 | <b>0.04</b> |
| INM-CM5-0      | 0.22      | <b>0.07</b> | 0.32   | <b>0.07</b> | 0.25 | <b>0.09</b> | 0.20 | <b>0.11</b> |
| KACE-1-0-G     | 0.09      | <b>0.06</b> | 0.20   | <b>0.06</b> | 0.08 | <b>0.03</b> | 0.08 | <b>0.03</b> |
| MIROC6         | 0.09      | <b>0.04</b> | 0.19   | <b>0.06</b> | 0.18 | <b>0.06</b> | 0.19 | <b>0.07</b> |
| MPI-ESM1-2-HR  | 0.15      | <b>0.05</b> | 0.23   | <b>0.05</b> | 0.15 | <b>0.09</b> | 0.07 | <b>0.03</b> |
| MPI-ESM1-2-LR  | 0.18      | <b>0.07</b> | 0.31   | <b>0.08</b> | 0.20 | <b>0.12</b> | 0.12 | <b>0.04</b> |
| MRI-ESM2-0     | 0.18      | <b>0.06</b> | 0.07   | <b>0.03</b> | 0.17 | <b>0.05</b> | 0.15 | <b>0.05</b> |
| NorESM2-LM     | 0.22      | <b>0.11</b> | 0.31   | <b>0.07</b> | 0.15 | <b>0.12</b> | 0.15 | <b>0.09</b> |
| average        | 0.16      | <b>0.07</b> | 0.25   | <b>0.05</b> | 0.17 | <b>0.07</b> | 0.14 | <b>0.06</b> |
